# Supplementary material
Source: publisher figshare collection journal article supplement (https://gsajournals.figshare.com/ndownloader/files/11402348)
Supplement: Supplementary file 1 [file 11402348]

## Sheet: Sheet1
Table S4: Genes dysregulated in S2 cells and either kdm5[10424] wing disc microarray or kdm5[140] RNA-seq data
flybase reference	gene name	S2 cell value_1	S2 cell value_2	S2 cell log2 (fold_change)	q_value	significant	ratio	fold change	kdm5[140] RNA-seq (log2 fold change)	kdm5[140] q value	kdm5[140] RNA-seq significant?	microarray kdm5[10424] fold change	Microarray significant?
FBgn0028746	CG18508	15.3287	7.06313	-1.11785	0.0300348	yes	0.46078	-2.17023	-0.67	0.0049631	YES	-1.77	YES
FBgn0053181	CG33181	0.637924	0.245366	-1.37845	0.0416893	yes	0.384632	-2.59989	-0.4	0.0124413	YES	-
FBgn0032253	CG5322/LManI	10.8064	4.50823	-1.26125	0.00172023	yes	0.417182	-2.39703	0.0008	0.986446	NO	-2.2	YES
FBgn0038290	CG6912	21.7624	11.0904	-0.972534	0.00550428	yes	0.50961	-1.96228	-1.62	1.01407e-15	YES	-1.1	YES
FBgn0021944	Coprox	68.8865	102.56	0.57418	0.0347345	yes	1.48883	1.48883	0.59	1.62515e-05	YES	1.6	YES
FBgn0039494	grass	38.6113	21.6788	-0.83274	0.012929	yes	0.561462	-1.78106	-0.72	0.000699886	YES	-1.95	YES
FBgn0038020	GstD9	319.85	483.668	0.59662	0.0232489	yes	1.51217	1.51217	1.15	1.28478e-11	YES	-
FBgn0030484	GstT4	204.195	297.957	0.545156	0.0288936	yes	1.45918	1.45918	0.51	3.51111e-06	YES	-
FBgn0020545	kraken	56.0663	83.3539	0.572115	0.0405586	yes	1.4867	1.4867	0.51	3.53316e-06	YES	1.31	YES
FBgn0002543	lea/robo2	2.27165	1.06252	-1.09625	0.012929	yes	0.467731	-2.13798	-0.39	0.00144619	YES	-
FBgn0031759	lid	37.2145	14.9418	-1.31652	0.00172023	yes	0.401502	-2.49065	-	5.73183e-09	YES	-50	YES
FBgn0027611	LM408/LManII	136.817	90.8406	-0.590843	0.0145319	yes	0.663955	-1.50613	-0.87	1.83512e-19	YES	-5.98	YES
FBgn0004647	N	7.27389	4.37159	-0.734568	0.0160572	yes	0.600998	-1.6639	-0.49	0.000441893	YES	-
FBgn0040752	Prosap	21.3305	14.157	-0.591396	0.0205023	yes	0.6637	-1.5067	-0.33	0.00416559	YES	-
FBgn0021800	Reph	8.42096	4.77132	-0.819598	0.0153093	yes	0.5666	-1.76491	-1.1	2.53462e-18	YES	-2.8	YES
FBgn0025836	RhoGAP1A	1.23513	0.54593	-1.17787	0.0300348	yes	0.442004	-2.26243	-0.25	0.0448798	YES	-
FBgn0004197	Ser	5.12032	2.89423	-0.823055	0.0300348	yes	0.565244	-1.76915	-0.38	0.00487966	YES	-
FBgn0034897	Sesn	26.1327	11.5671	-1.17583	0.00172023	yes	0.442629	-2.25923	0.0001	0.996582	NO	-1.8	YES
FBgn0264089	sli	6.0131	3.22471	-0.898942	0.0043618	yes	0.53628	-1.8647	-0.36	0.0124737	YES	-
FBgn0033132	Tsp42Ej	0.853823	0.149944	-2.50952	0.0277357	yes	0.175614	-5.69431	-0.53	0.0425226	YES	-
													YES
